# Supplementary material for: Variability of strain engraftment and predictability of microbiome composition after fecal microbiota transplantation across different diseases
Source: PubMed Central journal article supplement (PMC9499858; doi:10.1038/s41591-022-01964-3), 2022-09-15
Supplement: 41591_2022_1964_MOESM2_ESM.pdf [file 41591_2022_1964_MOESM2_ESM.pdf]

## Reporting Summary

Nature Portfolio wishes to improve the reproducibility of the work that we publish. This form provides structure for consistency and transparency in reporting. For further information on Nature Portfolio policies, see our [Editorial Policies](#) and the [Editorial Policy Checklist](#).

### Statistics

For all statistical analyses, confirm that the following items are present in the figure legend, table legend, main text, or Methods section.

n/a | Confirmed

- The exact sample size ( $n$ ) for each experimental group/condition, given as a discrete number and unit of measurement
- A statement on whether measurements were taken from distinct samples or whether the same sample was measured repeatedly
- The statistical test(s) used AND whether they are one- or two-sided  
*Only common tests should be described solely by name; describe more complex techniques in the Methods section.*
- A description of all covariates tested
- A description of any assumptions or corrections, such as tests of normality and adjustment for multiple comparisons
- A full description of the statistical parameters including central tendency (e.g. means) or other basic estimates (e.g. regression coefficient) AND variation (e.g. standard deviation) or associated estimates of uncertainty (e.g. confidence intervals)
- For null hypothesis testing, the test statistic (e.g.  $F$ ,  $t$ ,  $r$ ) with confidence intervals, effect sizes, degrees of freedom and  $P$  value noted  
*Give  $P$  values as exact values whenever suitable.*
- For Bayesian analysis, information on the choice of priors and Markov chain Monte Carlo settings
- For hierarchical and complex designs, identification of the appropriate level for tests and full reporting of outcomes
- Estimates of effect sizes (e.g. Cohen's  $d$ , Pearson's  $r$ ), indicating how they were calculated

*Our web collection on [statistics for biologists](#) contains articles on many of the points above.*

### Software and code

Policy information about [availability of computer code](#)

Data collection

Data analysis

For manuscripts utilizing custom algorithms or software that are central to the research but not yet described in published literature, software must be made available to editors and reviewers. We strongly encourage code deposition in a community repository (e.g. GitHub). See the Nature Portfolio [guidelines for submitting code & software](#) for further information.

## Data

Policy information about [availability of data](#)

All manuscripts must include a [data availability statement](#). This statement should provide the following information, where applicable:

- Accession codes, unique identifiers, or web links for publicly available datasets
- A description of any restrictions on data availability
- For clinical datasets or third party data, please ensure that the statement adheres to our [policy](#)

Newly-generated shotgun metagenomics sequencing data are available at the European Nucleotide Archive under accession number PRJEB47909. Metadata are available in Supplementary Table 2 and in curatedMetagenomicData.

## Human research participants

Policy information about [studies involving human research participants and Sex and Gender in Research](#).

|                             |                                                                                                                                                                                                                                                                                                                                                                                                     |
|-----------------------------|-----------------------------------------------------------------------------------------------------------------------------------------------------------------------------------------------------------------------------------------------------------------------------------------------------------------------------------------------------------------------------------------------------|
| Reporting on sex and gender | The sex of the study participants is reported in Supplementary Table 1 whenever available. Due to lack of availability in all published studies, this was not added as a covariate in the multivariate models.                                                                                                                                                                                      |
| Population characteristics  | Population characteristics of the 24 studies included in the analysis are reported in Supplementary Tables 1 and 2. 17 cohorts including 147 FMT recipients, 98 donors and 882 samples were included in the analysis, together with three novel cohorts enrolled for this study including 23 recipients, 8 donors and 115 samples.                                                                  |
| Recruitment                 | Three cohorts were newly enrolled, collected and sequenced in the context of this study (Fondazione Policlinico Gemelli IRCCS and Bambino Gesù Children's Hospital, Italy), as detailed in the Methods section. Participants that underwent FMT were recruited in the study, limiting the possibility of self-selection bias.                                                                       |
| Ethics oversight            | Study procedures of the newly-collected datasets were performed in compliance with the Declaration of Helsinki. Ethical approval was granted by Ethics Committees of Fondazione Policlinico Gemelli IRCCS (ID 3555/2021) and Ospedale Pediatrico Bambino Gesù IRCCS (1107_OPBG_2016). Written informed consent was obtained from all adult participants, and from parents of underage participants. |

Note that full information on the approval of the study protocol must also be provided in the manuscript.

## Field-specific reporting

Please select the one below that is the best fit for your research. If you are not sure, read the appropriate sections before making your selection.

Life sciences       Behavioural & social sciences       Ecological, evolutionary & environmental sciences

For a reference copy of the document with all sections, see [nature.com/documents/nr-reporting-summary-flat.pdf](https://www.nature.com/documents/nr-reporting-summary-flat.pdf)

## Life sciences study design

All studies must disclose on these points even when the disclosure is negative.

|                 |                                                                                                                                                                                                                                                                                                                                           |
|-----------------|-------------------------------------------------------------------------------------------------------------------------------------------------------------------------------------------------------------------------------------------------------------------------------------------------------------------------------------------|
| Sample size     | In this meta-analysis we systematically searched PubMed, Scopus, and ISI Web of Knowledge for potentially eligible studies. In addition, three novel cohorts were newly-sequenced for this study, making it the largest set available. Due to lack of previous data, no power calculation could be performed as part of the study design. |
| Data exclusions | No data were excluded from the analyses.                                                                                                                                                                                                                                                                                                  |
| Replication     | The data included in this study was meta-analysed, no replication was performed.                                                                                                                                                                                                                                                          |
| Randomization   | Samples were allocated to FMT triads based on previous published information (metadata of each study) or inferred based on strain sharing patterns when this information was not available. No new groupings were set as part of this analysis.                                                                                           |
| Blinding        | All patients were administered FMT from donors (no placebo). The information on whether samples were from FMT donors or recipients were available to the researchers as this was needed to perform the statistical analysis.                                                                                                              |

## Reporting for specific materials, systems and methods

We require information from authors about some types of materials, experimental systems and methods used in many studies. Here, indicate whether each material, system or method listed is relevant to your study. If you are not sure if a list item applies to your research, read the appropriate section before selecting a response.

### Materials & experimental systems

| n/a                                 | Involvement              | Material/System               |
|-------------------------------------|--------------------------|-------------------------------|
| <input checked="" type="checkbox"/> | <input type="checkbox"/> | Antibodies                    |
| <input checked="" type="checkbox"/> | <input type="checkbox"/> | Eukaryotic cell lines         |
| <input checked="" type="checkbox"/> | <input type="checkbox"/> | Palaeontology and archaeology |
| <input checked="" type="checkbox"/> | <input type="checkbox"/> | Animals and other organisms   |
| <input checked="" type="checkbox"/> | <input type="checkbox"/> | Clinical data                 |
| <input checked="" type="checkbox"/> | <input type="checkbox"/> | Dual use research of concern  |

### Methods

| n/a                                 | Involvement              | Method                 |
|-------------------------------------|--------------------------|------------------------|
| <input checked="" type="checkbox"/> | <input type="checkbox"/> | ChIP-seq               |
| <input checked="" type="checkbox"/> | <input type="checkbox"/> | Flow cytometry         |
| <input checked="" type="checkbox"/> | <input type="checkbox"/> | MRI-based neuroimaging |
